# Supplementary material for: Crosstalk within a functional INO80 complex dimer regulates nucleosome sliding
Source: eLife. 2017 Jun 6;6:e25782. doi: 10.7554/eLife.25782 (PMC5472440; doi:10.7554/eLife.25782)
Supplement: Figure 8—source data 1. — DOI: http://dx.doi.org/10.7554/eLife.25782.021 [file elife-25782-fig8-data1.xlsx]

## Sheet: Sheet1
Figure 8 – Source Data 1
	Sliding			ATPase
Titration	Vmax	h		Vmax	h
WT	1100 ± 55	1.9 ± 0.1		835 ± 97	1.3 ± 0.1
WT:EA (1:1)	657 ± 26	1.8 ± 0.2		585 ± 54	0.9 ± 0.1
WT:EAΔCTD (1:1)	570 ± 34	1.6 ± 0.1		756 ± 122	0.9 ± 0.1
WTΔCTD	334 ± 8	2.0 ± 0.1		1340 ± 104	1.4 ± 0.1
WTΔCTD:EA (1:1)	398 ± 88	1.2 ± 0.2		3770 ± 900	1.0 ± 0.1
WTΔCTD:EAΔCTD (1:1)	114 ± 20	0.9 ± 0.1		1580 ± 97	1.2 ± 0.1
