# Supplementary material for: Crosstalk within a functional INO80 complex dimer regulates nucleosome sliding
Source: eLife journal article supplement (doi:10.7554/elife.25782), 2017-06-06

Figure 5 – Figure Supplement 1

A

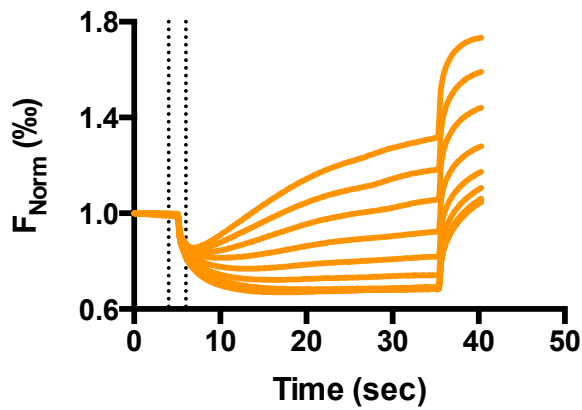

B

| Activity                                         | hINO80           |               | hINO80 $\Delta$ CTD |               |
|--------------------------------------------------|------------------|---------------|---------------------|---------------|
|                                                  | $V_{\text{max}}$ | h             | $V_{\text{max}}$    | h             |
| Sliding ( $\Delta F \cdot \text{sec}^{-1}$ )     | $1590 \pm 23$    | $1.9 \pm 0.1$ | $340 \pm 5$         | $2.0 \pm 0.1$ |
| ATPase ( $\text{nM ATP} \cdot \text{sec}^{-1}$ ) |                  |               |                     |               |
| Nucleosome                                       | $785 \pm 34$     | $1.3 \pm 0.1$ | $1300 \pm 42$       | $1.4 \pm 0.1$ |
| Unstimulated                                     | n/a              | $1.1 \pm 0.1$ | n/a                 | $1.1 \pm 0.1$ |

C

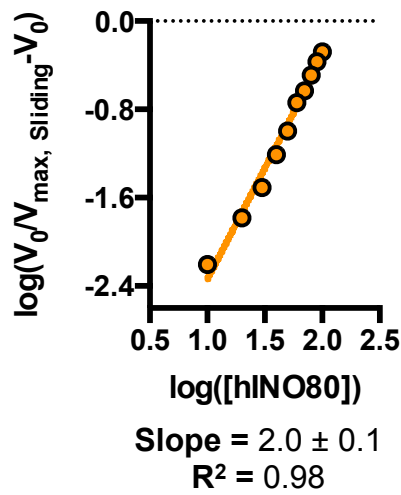

D

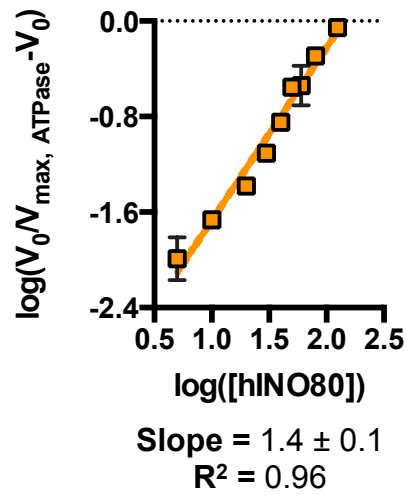

Supplement: supp [file elife_poa_e25782_Figure_5_Supplement_1.pdf › elife_poa_e25782_Figure_5_Supplement_1.pdf]
