# Supplementary material for: Crosstalk within a functional INO80 complex dimer regulates nucleosome sliding
Source: eLife journal article supplement (doi:10.7554/elife.25782), 2017-06-06
Supplement: supp [file elife_poa_e25782_Figure_8_Supplement_1.pdf › elife_poa_e25782_Figure_8_Supplement_1.pdf]

## Figure 8 – Figure Supplement 1

| Titration                             | Sliding       |               | ATPase         |               |
|---------------------------------------|---------------|---------------|----------------|---------------|
|                                       | $V_{\max}$    | $h$           | $V_{\max}$     | $h$           |
| WT                                    | $1100 \pm 55$ | $1.9 \pm 0.1$ | $835 \pm 97$   | $1.3 \pm 0.1$ |
| WT:EA (1:1)                           | $657 \pm 26$  | $1.8 \pm 0.2$ | $585 \pm 54$   | $0.9 \pm 0.1$ |
| WT:EA $\Delta$ CTD (1:1)              | $570 \pm 34$  | $1.6 \pm 0.1$ | $756 \pm 122$  | $0.9 \pm 0.1$ |
| WT $\Delta$ CTD                       | $334 \pm 8$   | $2.0 \pm 0.1$ | $1340 \pm 104$ | $1.4 \pm 0.1$ |
| WT $\Delta$ CTD:EA (1:1)              | $398 \pm 88$  | $1.2 \pm 0.2$ | $3770 \pm 900$ | $1.0 \pm 0.1$ |
| WT $\Delta$ CTD:EA $\Delta$ CTD (1:1) | $114 \pm 20$  | $0.9 \pm 0.1$ | $1580 \pm 97$  | $1.2 \pm 0.1$ |
