# Supplementary figures and images for: Crosstalk within a functional INO80 complex dimer regulates nucleosome sliding
Source: eLife journal article supplement (doi:10.7554/elife.25782), 2017-06-06

Figure 1 – Figure Supplement 1

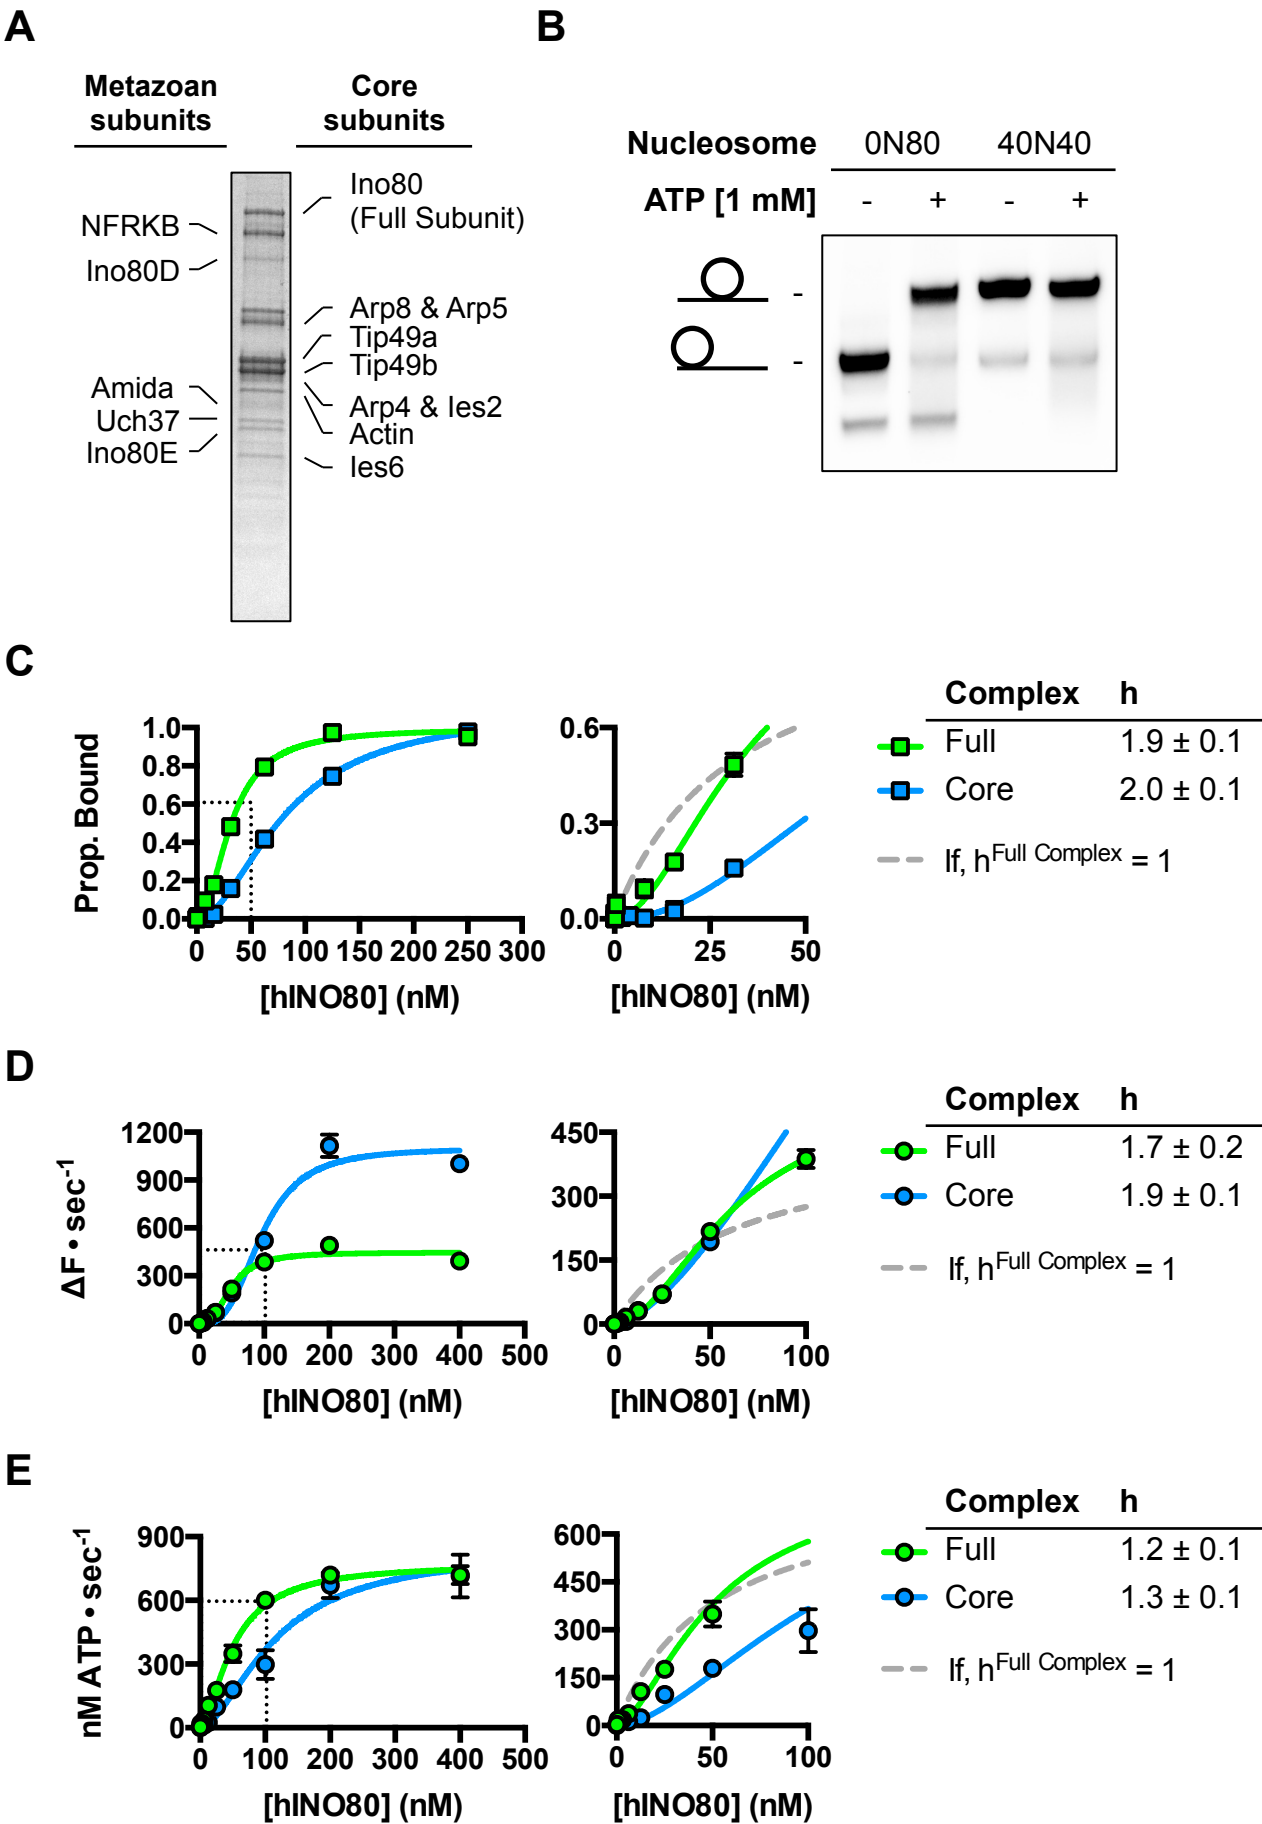

Supplement: supp [file elife_poa_e25782_Figure_1_Supplement_1.pdf › elife_poa_e25782_Figure_1_Supplement_1.pdf]

Figure 1 – Figure Supplement 2

**A**

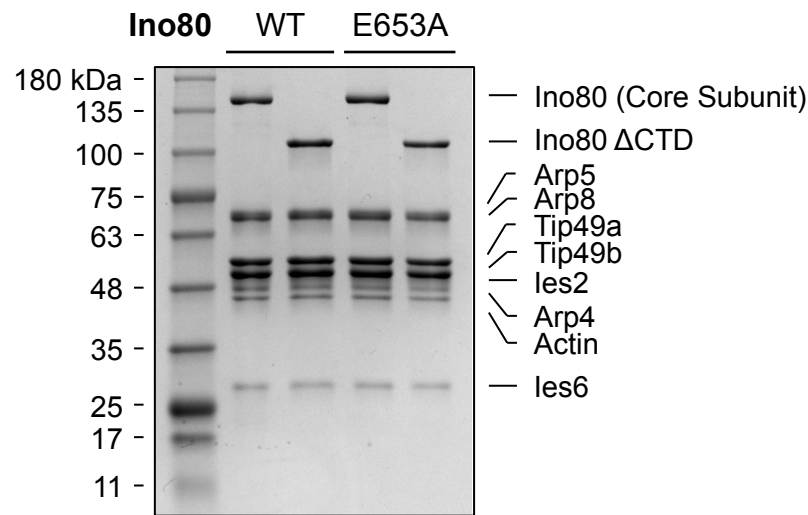

**B**

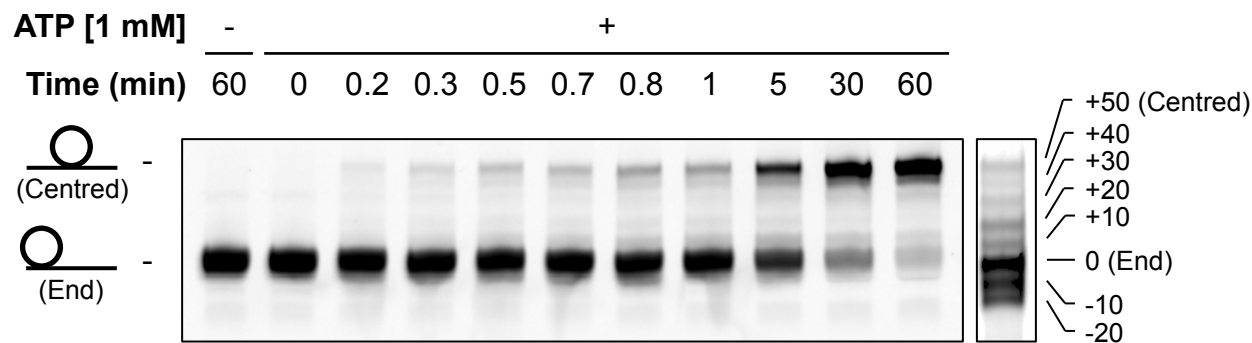

**C**

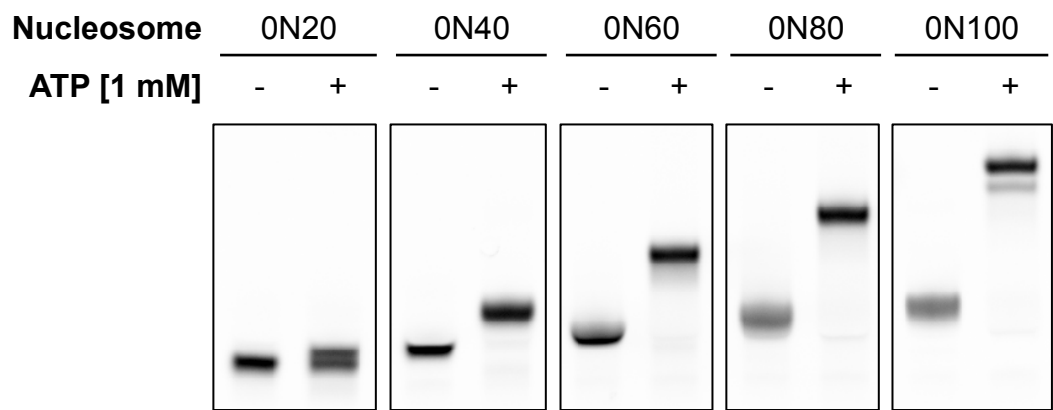

Supplement: supp [file elife_poa_e25782_Figure_1_Supplement_2.pdf › elife_poa_e25782_Figure_1_Supplement_2.pdf]

Figure 1 – Figure Supplement 3

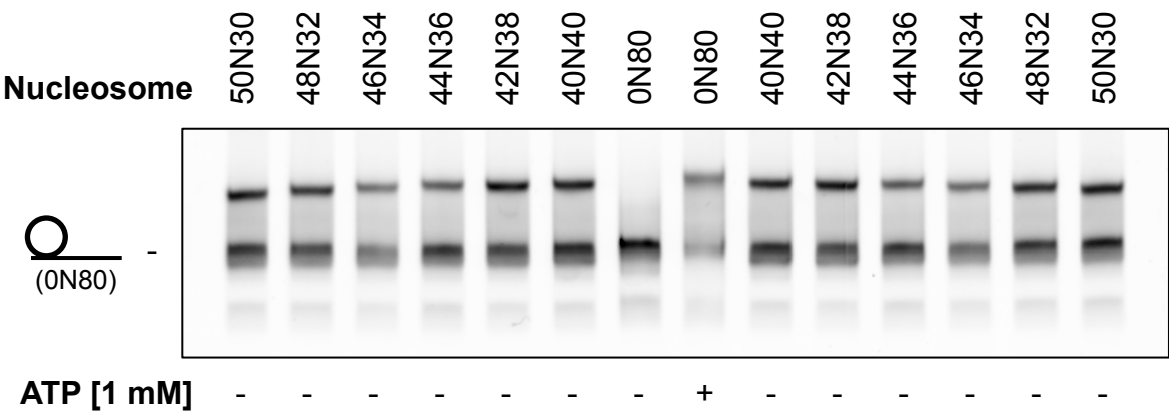

Supplement: supp [file elife_poa_e25782_Figure_1_Supplement_3.pdf › elife_poa_e25782_Figure_1_Supplement_3.pdf]

Figure 2 – Figure Supplement 1

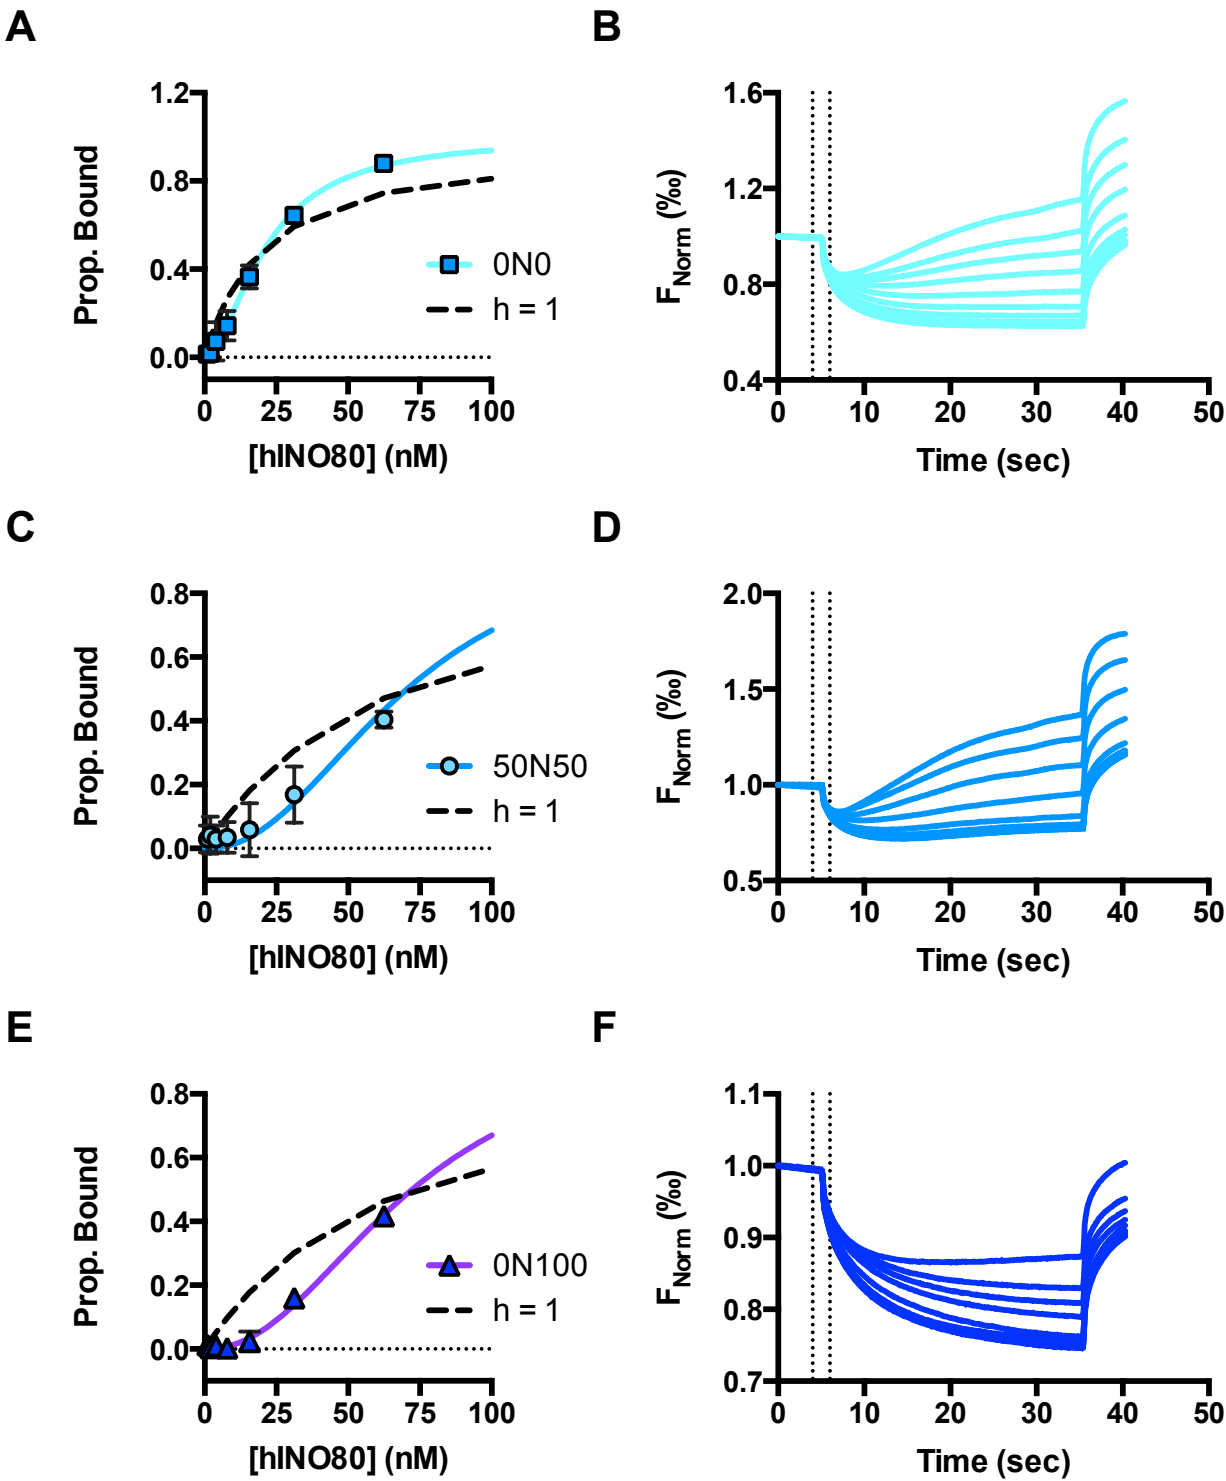

Supplement: supp [file elife_poa_e25782_Figure_2_Supplement_1.pdf › elife_poa_e25782_Figure_2_Supplement_1.pdf]

Figure 2 – Figure Supplement 2

A

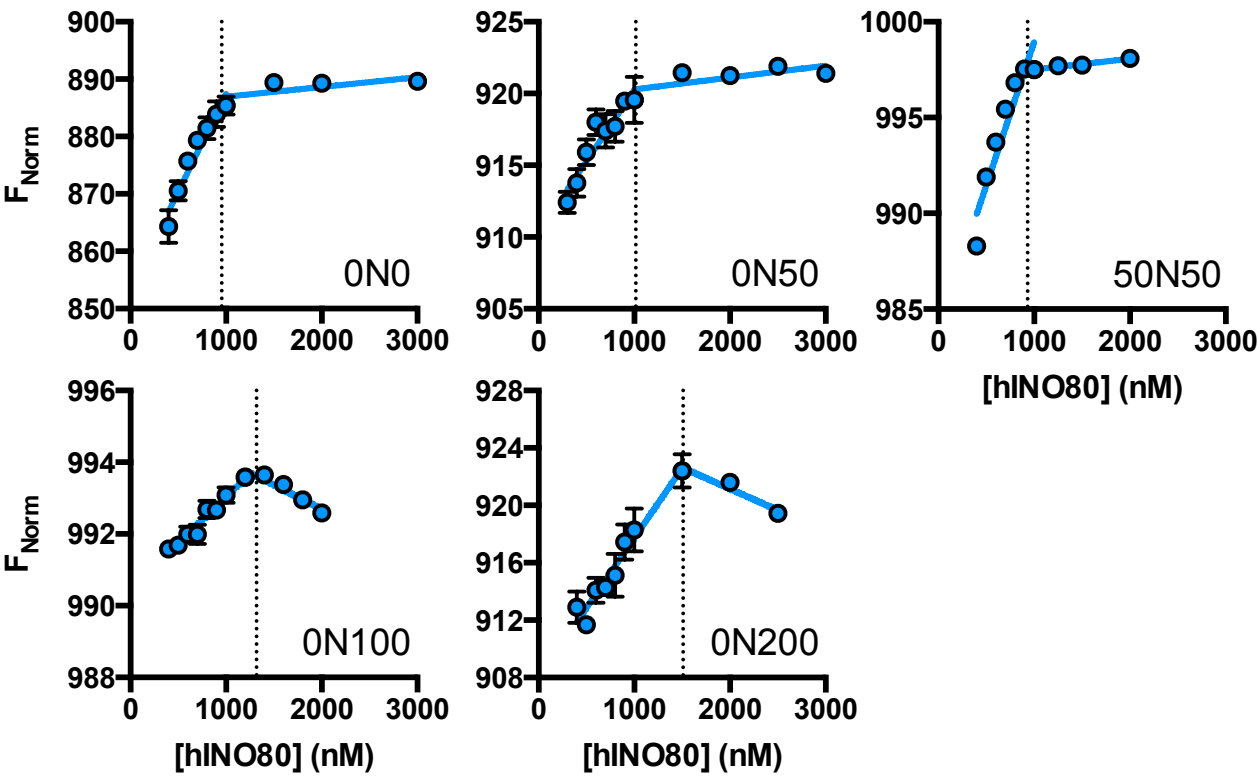

B

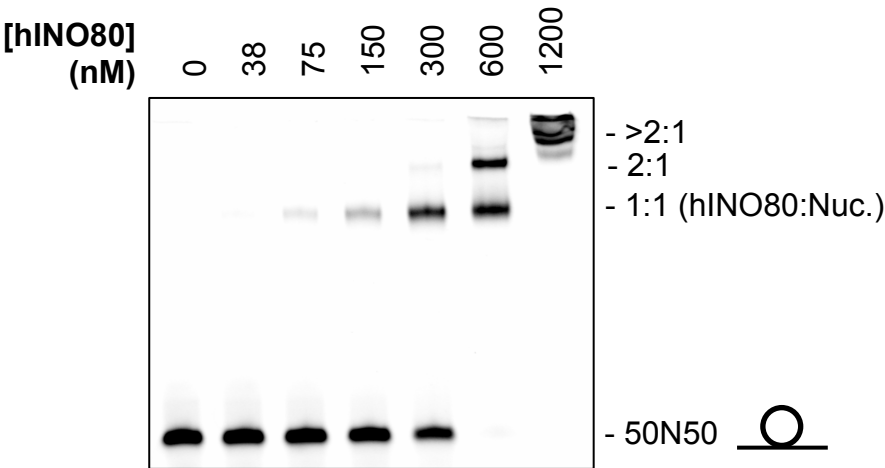

Supplement: supp [file elife_poa_e25782_Figure_2_Supplement_2.pdf › elife_poa_e25782_Figure_2_Supplement_2.pdf]

Figure 3 – Figure Supplement 1

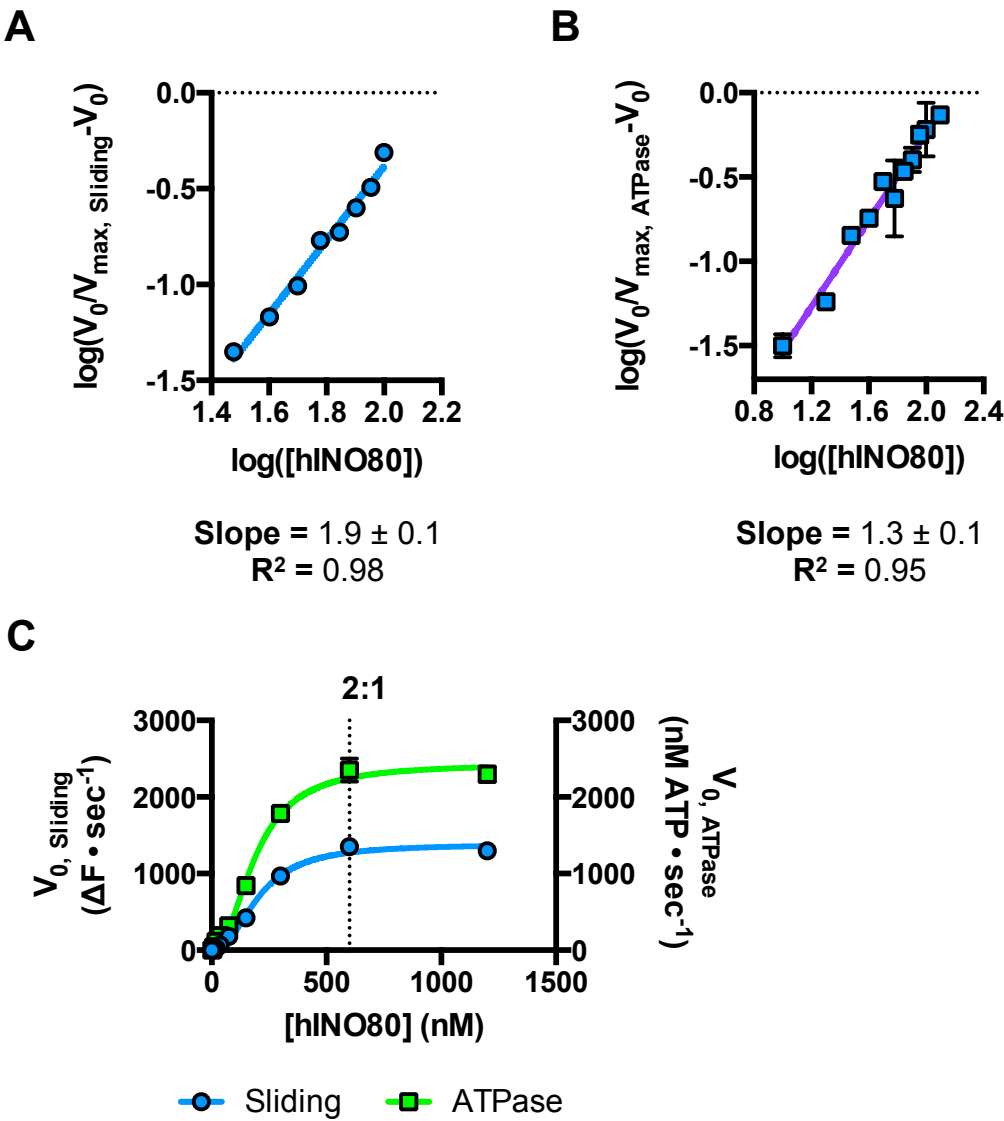

Supplement: supp [file elife_poa_e25782_Figure_3_Supplement_1.pdf › elife_poa_e25782_Figure_3_Supplement_1.pdf]

## Figure 3 – Figure Supplement 2

**A**

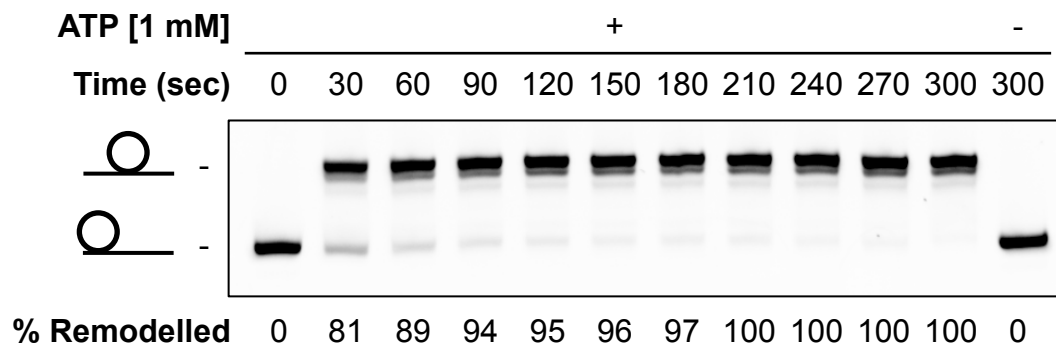

# B

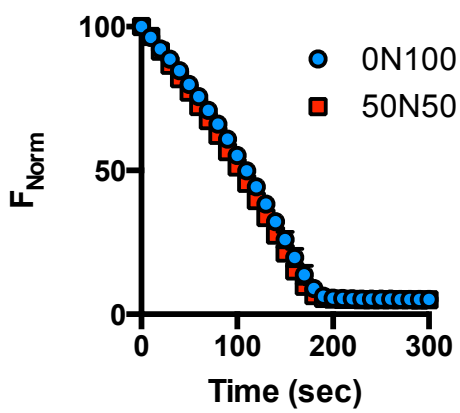

**C**

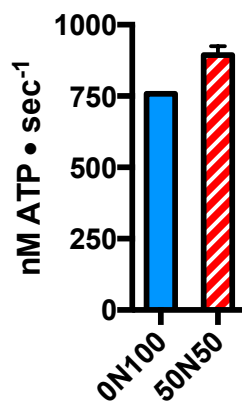

Supplement: supp [file elife_poa_e25782_Figure_3_Supplement_2.pdf › elife_poa_e25782_Figure_3_Supplement_2.pdf]

Figure 4 – Figure Supplement 1

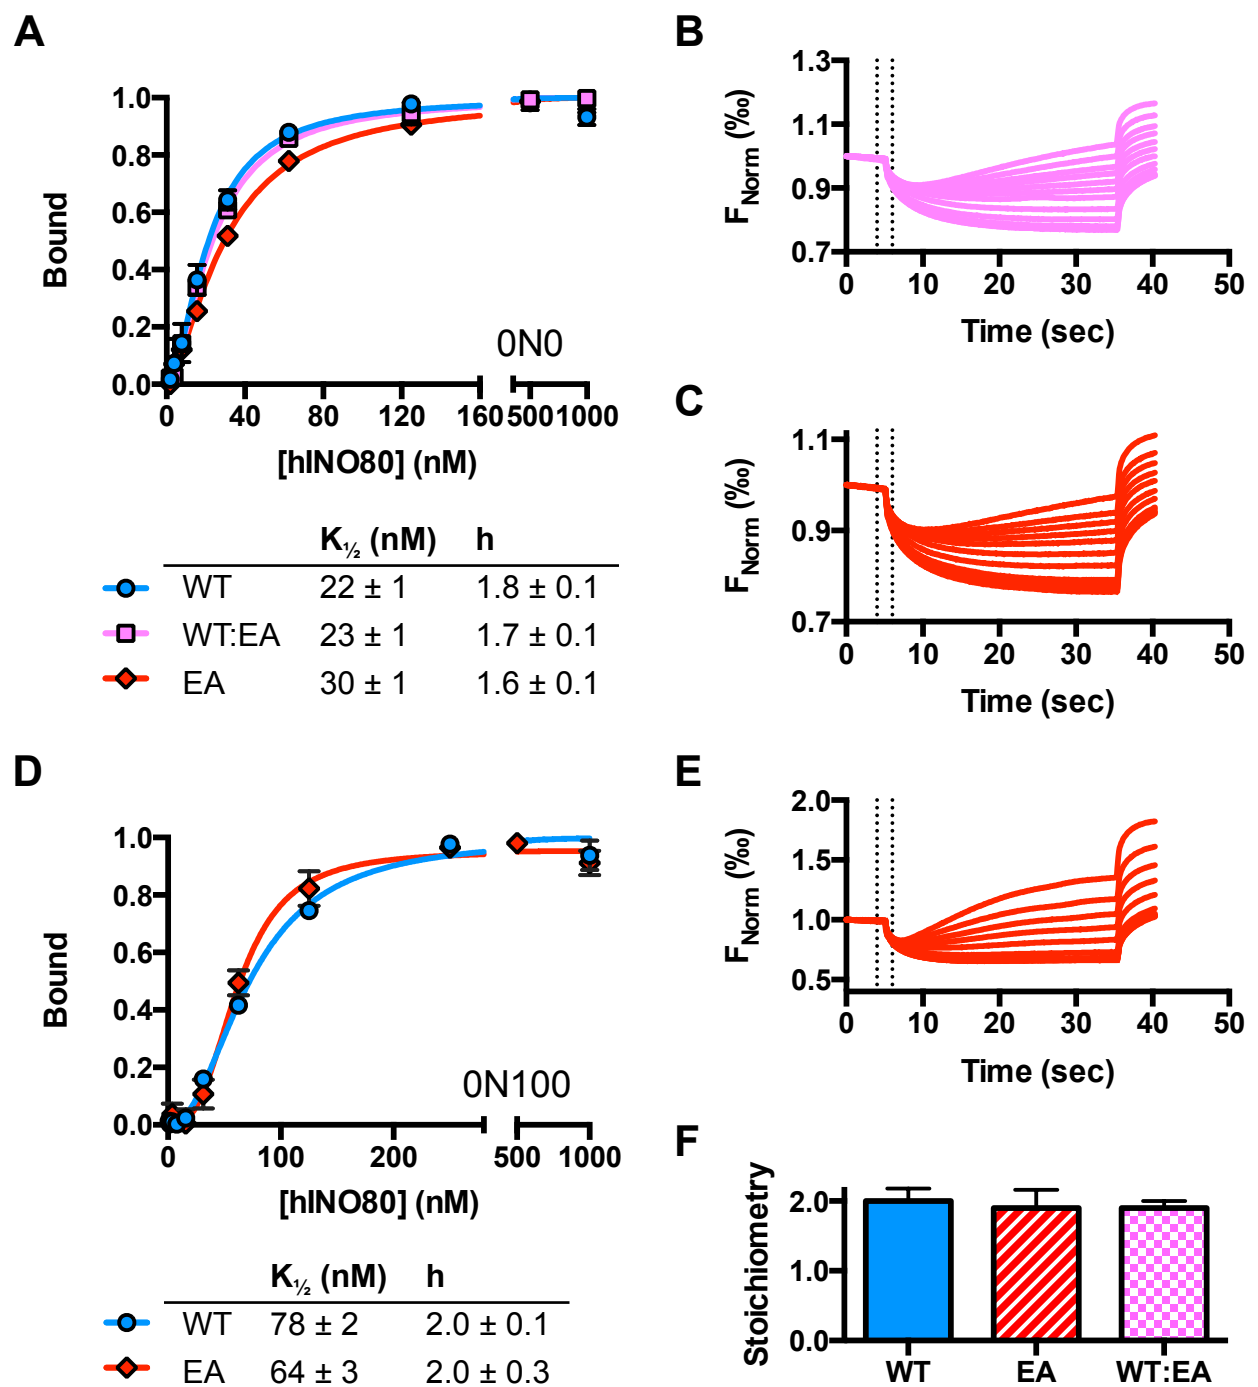

Supplement: supp [file elife_poa_e25782_Figure_4_Supplement_1.pdf › elife_poa_e25782_Figure_4_Supplement_1.pdf]

Figure 6 – Figure Supplement 1

A

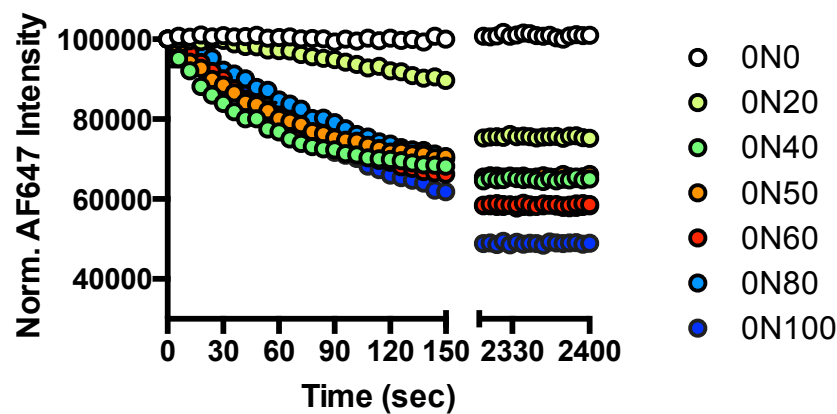

B

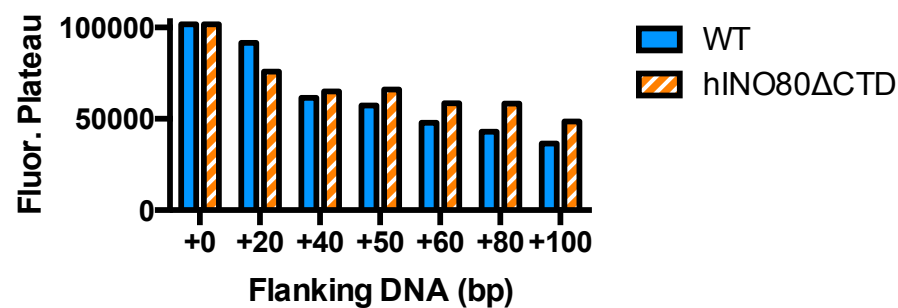

Supplement: supp [file elife_poa_e25782_Figure_6_Supplement_1.pdf › elife_poa_e25782_Figure_6_Supplement_1.pdf]

Figure 7 – Figure Supplement 1

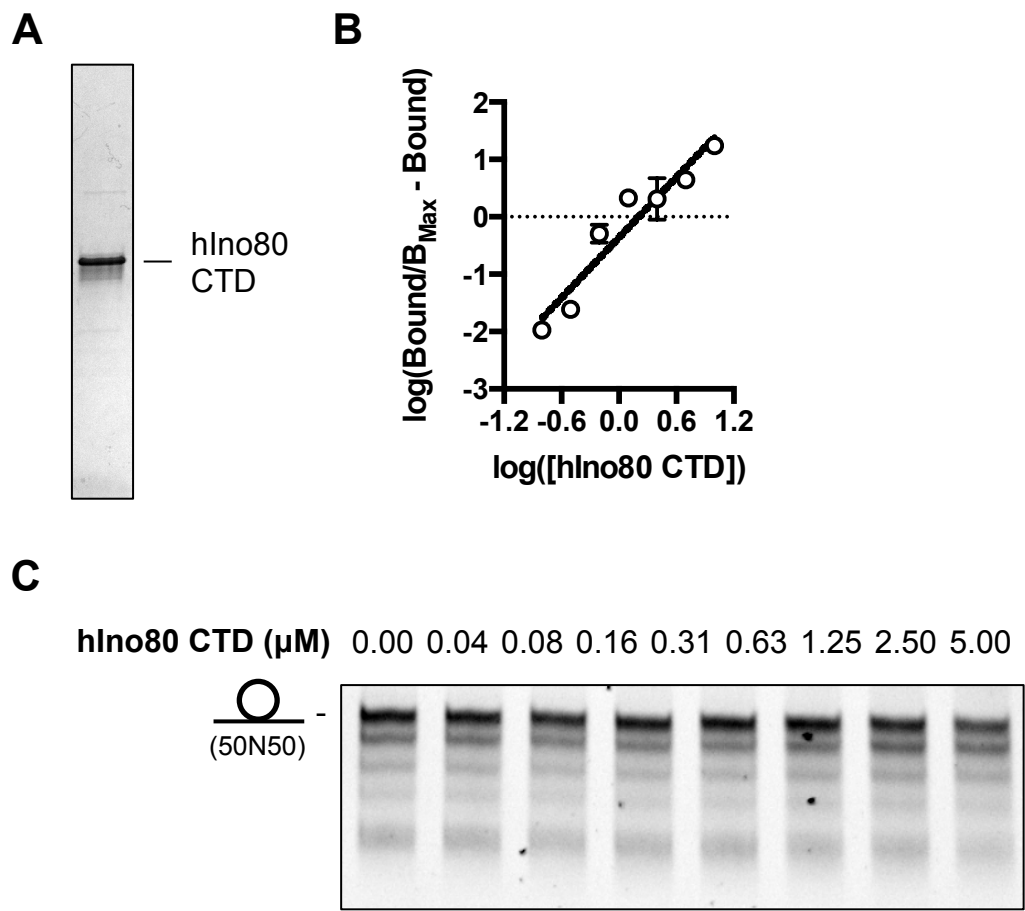

Supplement: supp [file elife_poa_e25782_Figure_7_Supplement_1.pdf › elife_poa_e25782_Figure_7_Supplement_1.pdf]
